# Supplementary material
Source: Springer Nature journal article supplement (https://www.springermedizin.de/resource/supplementary/12914_2012_233_MOESM1_ESM.pdf/9537092)
Supplement: MOESM1 [file 9537092]

Assessed for eligibility  
by independent examiner  
(n=79)

Declined to participate  
(n=17)

Excluded according to  
exclusion criteria  
(n=27)

Blinded examination  
(n=35)

Drop-outs  
(n=3)

Individual analysis  
(n=32)

Breaking codes

Not exposed to falanga  
group analysis  
(n =17)

Exposed to falanga  
group analysis  
(n=15)
